# Supplementary material
Source: ML conference proceedings conference paper supplement (https://proceedings.mlr.press/v139/liu21b.html)
Supplement: Supplementary file [file liu21b-supp.pdf]

## A. Experiment Details

The corresponding hyperparameters used in Atari experiments are shown in Table 4 and Table 5. We follow Kostrikov et al. (2020) to use data augmentation techniques that consist of a simple random shift which has been shown effective in visual domain RL. Specifically, the images are padded each side by 4 pixels (by repeating boundary pixels) and then select a random  $84 \times 84$  crop, yielding the original image. This procedure is repeated every time an image is sampled from the replay buffer.

We also use the same generalized policy improvement(GPI) (Barreto et al., 2017; 2020) as in VISR with the number of policies 10. GPI is also used in VISR to ensure a fair comparison. Per common practice, we average performance of our agent over 5 random seeds. The evaluation is done for 125K environment steps at the end of training for 100K environment steps.

The ablated variant APS w/o shared encoder follows APT (Liu & Abbeel, 2021) but the output dimension of the neural encoder  $f$  is decreased to 5 in order to match the default APS. The projection network in contrastive learning is a two-layer MLP with hidden size of 128 and output size of 64. We also use the same temperature and other hyperparameters as APT for the ablation study.

## B. Scores Breakdown on 57 Atari games

A comparison between APS and baselines on each individual game of the 57 Atari game suite is shown in Table 6. APS achieves super-human performance on 15 games, compared to a maximum of 12 for any previous methods and achieves scores significantly higher than any previous methods.

Table 4: Hyper-parameters for RL.

| Parameter                                                  | Setting                              |
|------------------------------------------------------------|--------------------------------------|
| Terminal on loss of life                                   | True                                 |
| Reward clipping (fine-tuning phase)                        | $[-1, 1]$                            |
| Data augmentation                                          | Random shifts and Intensity          |
| Grey-scaling                                               | True                                 |
| Observation down-sampling                                  | $84 \times 84$                       |
| Frames stacked                                             | 4                                    |
| Action repetitions                                         | 4                                    |
| Max frames per episode                                     | 108k                                 |
| Update                                                     | Double Q                             |
| Target network: update period                              | 100                                  |
| Discount factor                                            | 0.99                                 |
| Minibatch size                                             | 32                                   |
| $\psi, \phi$ optimizer                                     | Adam                                 |
| $\psi, \phi$ optimizer (pre-training phase): learning rate | 0.0001                               |
| $\psi, \phi$ optimizer (fine-tuning phase): learning rate  | 0.001                                |
| $\psi, \phi$ optimizer: $\beta_1$                          | 0.9                                  |
| $\psi, \phi$ optimizer: $\beta_2$                          | 0.999                                |
| $\psi, \phi$ optimizer: $\epsilon$                         | 0.00015                              |
| Max gradient norm                                          | 10                                   |
| Training steps (fine-tuning phase)                         | 60K                                  |
| Task identity steps (fine-tuning phase)                    | 40K                                  |
| Training steps (pre-training phase)                        | 5M                                   |
| Evaluation steps                                           | 125K                                 |
| Min replay size for sampling                               | 1600                                 |
| Memory size                                                | Unbounded                            |
| Replay period every                                        | 1 step                               |
| Multi-step return length                                   | 10                                   |
| $\psi$ network: channels                                   | 32, 64, 64                           |
| $\psi$ network: filter size                                | $8 \times 8, 4 \times 4, 3 \times 3$ |
| $\psi$ network: stride                                     | 4, 2, 1                              |
| $\psi$ network: hidden units                               | 512                                  |
| $\psi$ Non-linearity                                       | ReLU                                 |
| Exploration                                                | $\epsilon$ -greedy                   |
| $\epsilon$ -decay                                          | 2500                                 |

Table 5: Hyper-parameters for Learning  $\phi$ .

| Parameter                    | Setting                              |
|------------------------------|--------------------------------------|
| Value of k                   | search in $\{3, 5, 10\}$             |
| $\phi$ network: channels     | 32, 64, 64                           |
| $\phi$ network: filter size  | $8 \times 8, 4 \times 4, 3 \times 3$ |
| $\phi$ network: stride       | 4, 2, 1                              |
| $\phi$ network: hidden units | 512                                  |
| $\phi$ network Non-linearity | ELU                                  |
| FC hidden size               | 1024                                 |
| Output size                  | 5                                    |

Active Pretraining with Successor Features

Table 6: Comparison of raw scores of each method on Atari games. Results are averaged over five random seeds. @N represents the amount of RL interaction utilized at fine-tuning phase.

| Game                | Random   | Human   | VISR            | APT           | APS (ours)     |
|---------------------|----------|---------|-----------------|---------------|----------------|
| Alien               | 227.8    | 7127.7  | 364.4           | <b>2614.8</b> | 934.9          |
| Amidar              | 5.8      | 1719.5  | 186.0           | <b>211.5</b>  | 188.4          |
| Assault             | 222.4    | 742.0   | <b>1209.1</b>   | 891.5         | 413.3          |
| Asterix             | 210.0    | 8503.3  | <b>6216.7</b>   | 185.5         | 1159.5         |
| Asteroids           | 7191     | 47388.7 | <b>4443.3</b>   | 678.7         | 1519.7         |
| Atlantis            | 12850.0  | 29028.1 | 140542.8        | 40231.0       | <b>18920.0</b> |
| Bank Heist          | 14.2     | 753.1   | 71.3            | <b>416.7</b>  | 262.7          |
| Battle Zone         | 2360.0   | 37187.5 | 7072.7          | 7065.1        | <b>26920.1</b> |
| Beam Rider          | 363.9    | 16826.5 | 1741.9          | 3487.2        | <b>4981.2</b>  |
| Berzerk             | 123.7    | 2630.4  | 490.0           | <b>493.4</b>  | 387.4          |
| Bowling             | 23.1     | 160.7   | 21.2            | -56.5         | <b>56.5</b>    |
| Boxing              | 0.1      | 12.1    | 13.4            | 21.3          | <b>36.3</b>    |
| Breakout            | 1.7      | 30.5    | 17.9            | 10.9          | <b>19.1</b>    |
| Centipede           | 2090.9   | 12017.1 | <b>7184.9</b>   | 6233.9        | 3915.7         |
| Chopper Command     | 811.0    | 7387.8  | 800.8           | 317.0         | <b>2517.0</b>  |
| Crazy Climber       | 10780.5  | 23829.4 | 49373.9         | 44128.0       | <b>67328.1</b> |
| Defender            | 2874.5   | 18688.9 | 15876.1         | 5927.9        | <b>19921.5</b> |
| Demon Attack        | 107805   | 35829.4 | <b>8994.9</b>   | 6871.8        | 7989.0         |
| Double Dunk         | -18.6    | -16.4   | -22.6           | -17.2         | <b>-8.0</b>    |
| Enduro              | 0.0      | 860.5   | -3.1            | -0.3          | <b>216.8</b>   |
| Fishing Derby       | -91.7    | -38.7   | -93.9           | -5.6          | <b>-2.1</b>    |
| Freeway             | 0.0      | 29.6    | -12.1           | <b>29.9</b>   | 27.1           |
| Frostbite           | 65.2     | 4334.7  | 230.9           | <b>1796.1</b> | 496.1          |
| Gopher              | 257.6    | 2412.5  | 498.6           | <b>2190.4</b> | 2590.4         |
| Gravitar            | 173.0    | 3351.4  | 328.1           | <b>542.0</b>  | 487.0          |
| Hero                | 1027.0   | 30826.4 | 663.5           | 6789.1        | <b>12189.3</b> |
| Ice Hockey          | -11.2    | 0.9     | -18.1           | -30.1         | <b>-11.3</b>   |
| Jamesbond           | 29.0     | 302.8   | 484.4           | 356.1         | <b>622.3</b>   |
| Kangaroo            | 52.0     | 3035.0  | 1761.9          | 412.0         | <b>5280.1</b>  |
| Krull               | 1598.0   | 2665.5  | 3142.5          | 2312.0        | <b>4496.0</b>  |
| Kung Fu Master      | 258.5    | 22736.3 | 16754.9         | 17357.0       | 13112.1        |
| Montezuma Revenge   | 0.0      | 4753.3  | 0.0             | 147.0         | <b>211.0</b>   |
| Ms Pacman           | 307.3    | 6951.6  | 558.5           | <b>2527.1</b> | 2092.3         |
| Name This Game      | 2292.3   | 8049.0  | 2605.8          | 1387.2        | <b>6898.8</b>  |
| Phoenix             | 761.4    | 7242.6  | <b>7162.2</b>   | 3874.2        | 6871.8         |
| Pitfall             | -229.4   | 6463.7  | -370.8          | -12.8         | <b>-6.2</b>    |
| Pong                | -20.7    | 14.6    | -26.2           | -8.0          | <b>12.5</b>    |
| Private Eye         | 24.9     | 69571.3 | 98.3            | 96.1          | <b>117.9</b>   |
| Qbert               | 163.9    | 13455.0 | 666.3           | 17671.2       | <b>19271.4</b> |
| Riverraid           | 1338.5   | 17118.0 | 5422.2          | 4671.0        | <b>10521.3</b> |
| Road Runner         | 11.5     | 7845.0  | <b>6146.7</b>   | 4782.1        | 5919.0         |
| Robotank            | 2.2      | 11.9    | 10.0            | <b>13.7</b>   | 12.6           |
| Seaquest            | 68.4     | 42054.7 | 706.6           | 2116.7        | <b>4209.7</b>  |
| Skiing              | -17098.1 | -4336.9 | <b>-19692.5</b> | -38434.1      | -9102.1        |
| Solaris             | 1236.3   | 12326.7 | <b>1921.5</b>   | 841.8         | 1095.4         |
| Space Invaders      | 148.0    | 1668.7  | <b>9741.0</b>   | 3687.2        | 3693.8         |
| Star Gunner         | 664.0    | 10250.0 | 25827.5         | 8717.0        | <b>42970.0</b> |
| Surround            | -10.0    | 6.5     | -15.5           | <b>-2.5</b>   | -5.8           |
| Tennis              | -23.8    | -8.3    | 0.7             | 1.2           | <b>8.7</b>     |
| Time Pilot          | 3568.0   | 5229.2  | 4503.6          | 2567.0        | <b>4586.5</b>  |
| Tutankham           | 11.4     | 167.6   | 50.7            | <b>124.6</b>  | 45.6           |
| Up N Down           | 533.4    | 11693.2 | <b>10037.6</b>  | 8289.4        | 4911.9         |
| Venture             | 0.0      | 1187.5  | -1.7            | <b>231.0</b>  | 136.0          |
| Video Pinball       | 0.0      | 17667.9 | <b>35120.3</b>  | 2817.1        | 154414.1       |
| Wizard Of Wor       | 563.5    | 4756.5  | 853.3           | 1265.0        | <b>1732.1</b>  |
| Yars Revenge        | 3092.9   | 54576.9 | 5543.5          | 1871.5        | <b>6539.5</b>  |
| Zaxxon              | 32.5     | 9173.3  | 897.5           | 3231.0        | <b>5819.2</b>  |
| Mean Human-Norm'd   | 0.000    | 1.000   | 68.42           | 47.78         | <b>103.04</b>  |
| Median Human-Norm'd | 0.000    | 1.000   | 9.41            | 33.41         | <b>39.23</b>   |
| #Superhuman         | 0        | N/A     | 11              | 12            | <b>15</b>      |
